# Supplementary material for: Elucidating the mechanisms of enhanced lignin bioconversion by an alkali sterilization strategy
Source: Royal Society of Chemistry journal article supplement (doi:10.1039/d1gc00911g), 2021-01-01
Supplement: d1gc00911g1.pdf [file d1gc00911g1.pdf]

*Supplementary Information*

**Elucidating the mechanisms of enhanced lignin bioconversion by an  
alkali sterilization strategy**

Zhi-Min Zhao,<sup>a,b</sup> Shuyang Zhang,<sup>b</sup> Xianzhi Meng,<sup>b</sup> Yunqiao Pu,<sup>c</sup> Zhi-Hua Liu,<sup>d</sup>  
William K. Ledford,<sup>e</sup> S. Michael Kilbey II,<sup>b,e</sup> Bing-Zhi Li<sup>d</sup> and Arthur J. Ragauskas<sup>\*b,c,f</sup>

*<sup>a</sup> School of Ecology and Environment, Inner Mongolia Key Laboratory of Environmental Pollution Control & Wastes Reuse, Inner Mongolia University, Hohhot, 010021, China*

*<sup>b</sup> Department of Chemical & Biomolecular Engineering, University of Tennessee Knoxville, Knoxville, TN 37996, USA*

*<sup>c</sup> Joint Institute of Biological Science, Biosciences Division, Oak Ridge National Laboratory (ORNL), Oak Ridge, TN 37831, USA*

*<sup>d</sup> Frontiers Science Center for Synthetic Biology and Key Laboratory of Systems Bioengineering (Ministry of Education), School of Chemical Engineering and Technology, Tianjin University, Tianjin, 300072, China*

*<sup>e</sup> Department of Chemistry, University of Tennessee Knoxville, Knoxville, TN 37996, USA*

*<sup>f</sup> Department of Forestry, Wildlife, and Fisheries, Center for Renewable Carbon, University of Tennessee Institute of Agriculture, Knoxville, TN 37996, USA*

*\* Corresponding author: Arthur J. Ragauskas, E-mail address: [aragausk@utk.edu](mailto:aragausk@utk.edu)*

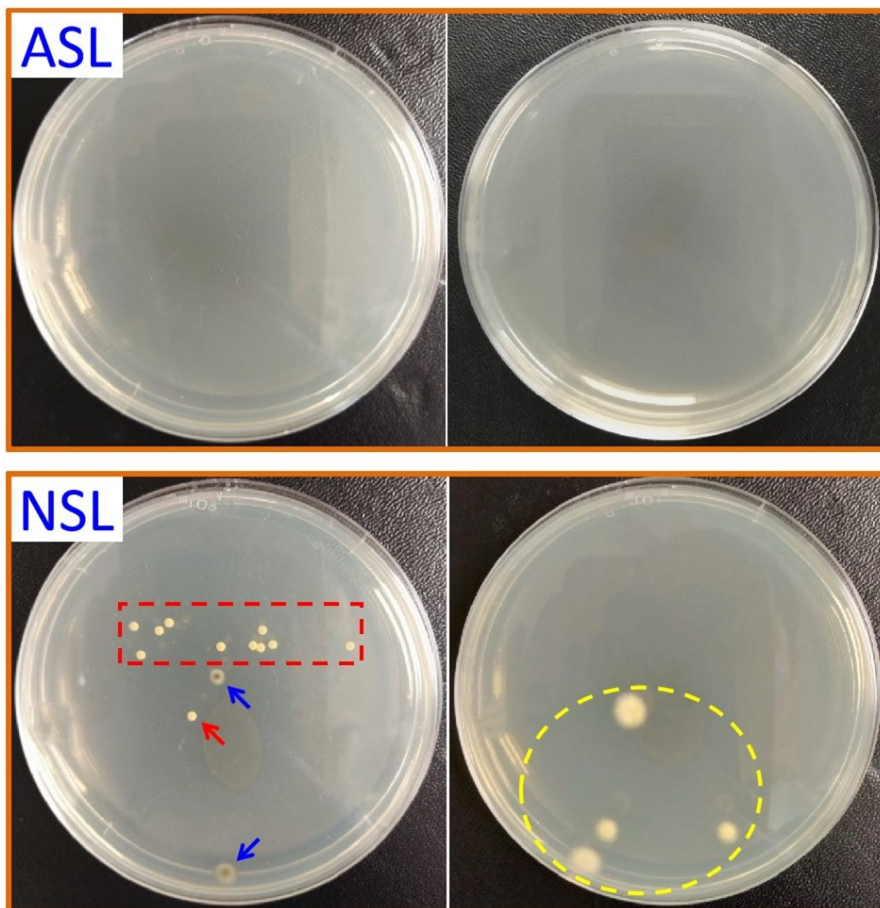

**Fig. S1** Examination of the aseptic effect of alkaline sterilized lignin (ASL) and non-sterilized lignin (NSL) mediums by spread plate method. These experiments were conducted with two replicates.

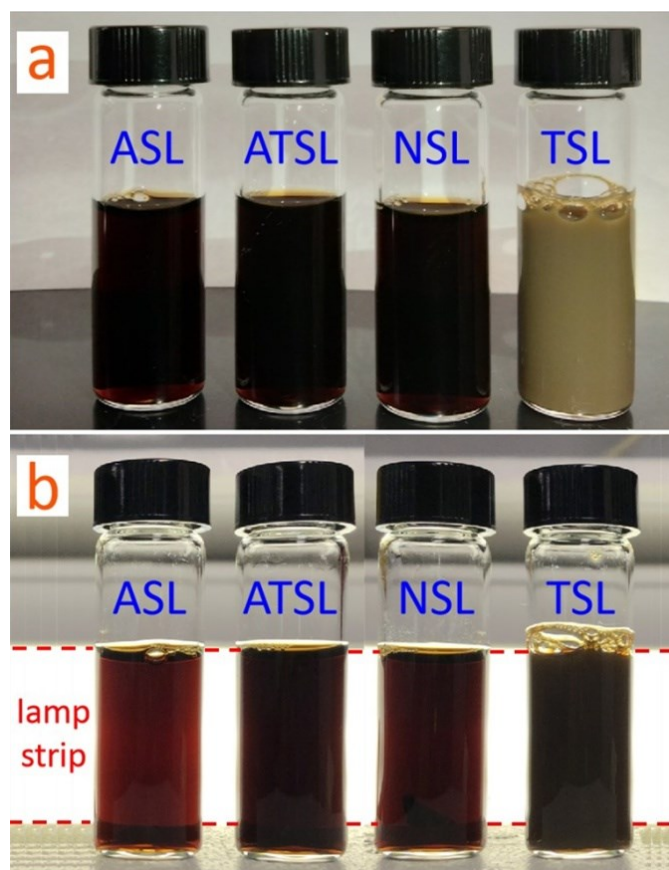

**Fig. S2** Comparison of lignin medium color under natural light (a) and light transmittance in front of a 600-W fluorescent lamp strip (b). ASL: alkaline sterilized lignin, ATSL: alkaline and thermally sterilized lignin, NSL: non-sterilized lignin, TSL: thermally sterilized lignin.
